# Supplementary material for: A surface modified laser-induced graphene based flexible biosensor for multiplexed sweat analysis
Source: Royal Society of Chemistry journal article supplement (doi:10.1039/d4tb01936a), 2024-11-01
Supplement: d4tb01936a1.pdf [file d4tb01936a1.pdf]

## Supporting Information

### Surface Modified Laser-Induced Graphene based Flexible Biosensor for Multiplexed Sweat Analysis

Sudipta Choudhury,<sup>a</sup> Saad Zafar,<sup>b</sup> Deepak Deepak,<sup>a</sup> Abhishek Panghal,<sup>a</sup> Bimlesh Lochab,<sup>b</sup>  
Susanta Sinha Roy<sup>a\*</sup>

<sup>a</sup>Department of Physics, School of Natural Sciences, Shiv Nadar Institution of Eminence (SNIoE),  
Deemed to be University, Delhi-NCR, Greater Noida, 201314, India.

<sup>b</sup> Materials Chemistry Laboratory, Department of Chemistry, School of Natural Sciences, Shiv  
Nadar Institution of Eminence, Delhi-NCR-201314, India.

#### **AUTHOR INFORMATION**

Corresponding Authors

\*E-mail: [susanta.roy@snu.edu.in](mailto:susanta.roy@snu.edu.in)

## Table of contents for supporting information

| Figure                                                                                                         | Page |
|----------------------------------------------------------------------------------------------------------------|------|
| 1. Zeta Potential NiO and $Ti_3C_2T_x$                                                                         | S3   |
| 2. TEM image of $Ti_3C_2T_x$ & EDS elemental spectra of $Ti_3AlC_2$                                            | S3   |
| 3. FTIR analysis of NiO, $Ti_3C_2T_x$ MXene and NiO- $Ti_3C_2T_x$ /LIG                                         | S4   |
| 4. TEM, HRTEM and SAED analysis of NiO- $Ti_3C_2T_x$ /LIG                                                      | S4   |
| 5. Raman spectra of bare LIG electrode                                                                         | S5   |
| 6. Optimization of pH, deposition potential and deposition time of NiO- $Ti_3C_2T_x$<br>modified LIG electrode | S5   |
| 7. Image of the fabricated NiO- $Ti_3C_2T_x$ /LIG electrode                                                    | S6   |
| <b>Table</b>                                                                                                   |      |
| 1. Calculated values of EIS parameters                                                                         | S6   |

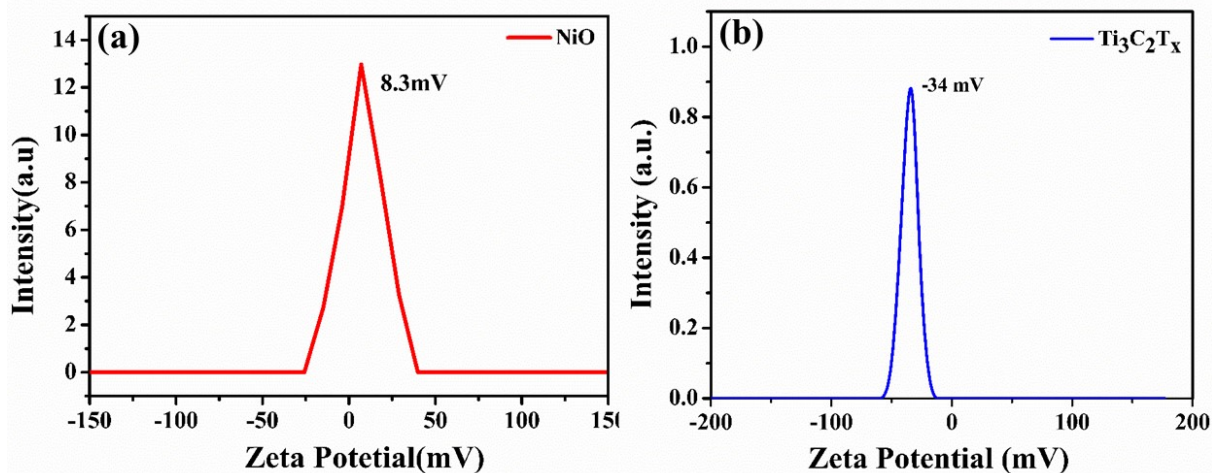

**Figure S1.** The zeta potential graph of (a) NiO nanoparticles (b) Ti<sub>3</sub>C<sub>2</sub>T<sub>x</sub> MXene nanosheets.

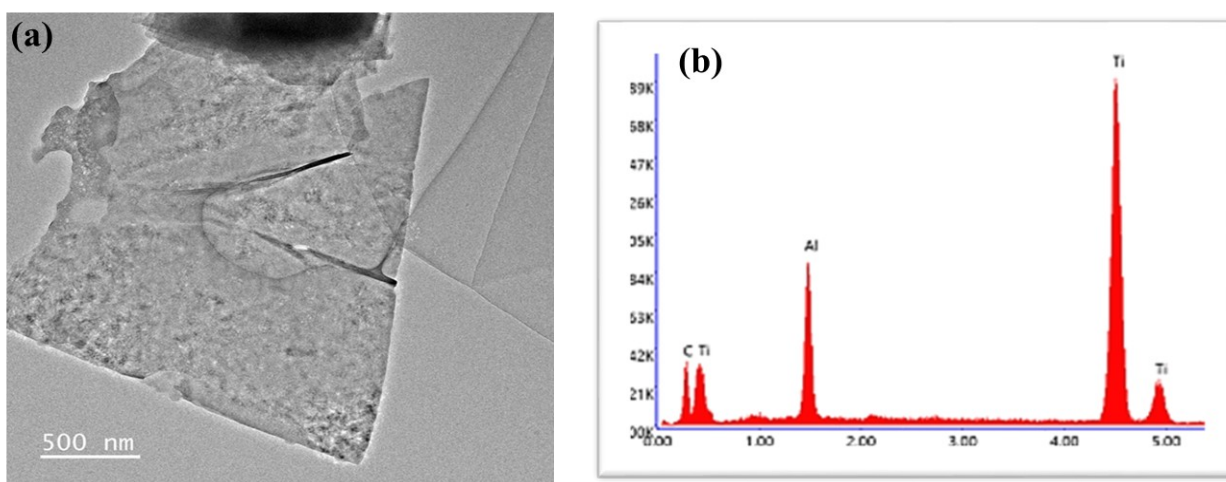

(c)

| Element | Weight (%) | Atomic (%) |
|---------|------------|------------|
| C       | 2.97       | 10.22      |
| Al      | 8.96       | 13.74      |
| Ti      | 88.07      | 76.04      |

**Figure S2.** (a) TEM image of Ti<sub>3</sub>C<sub>2</sub>T<sub>x</sub> MXene nanosheets (b) EDS elemental spectra of Ti<sub>3</sub>AlC<sub>2</sub> (c) Table showing the atomic and weight percentage of the elements of Ti<sub>3</sub>AlC<sub>2</sub>

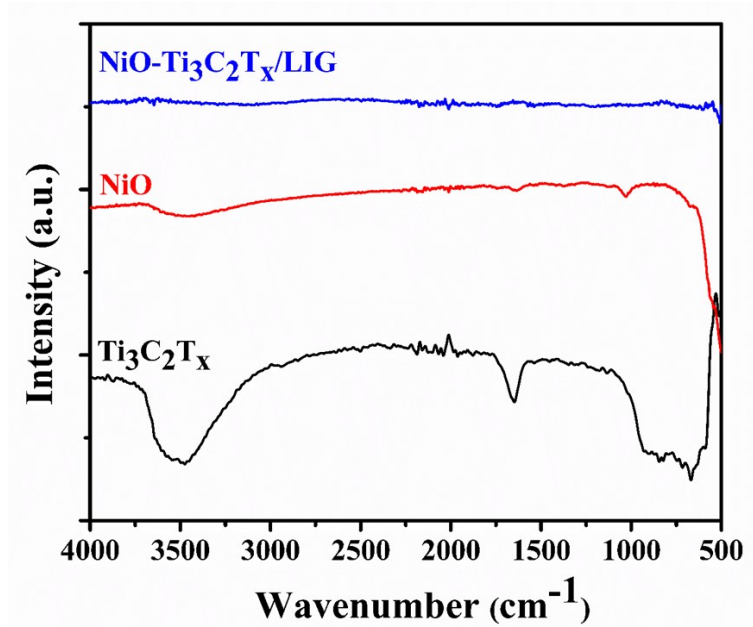

**Figure S3.** FTIR analysis of NiO,  $\text{Ti}_3\text{C}_2\text{T}_x$  MXene and NiO- $\text{Ti}_3\text{C}_2\text{T}_x$ /LIG composite electrode

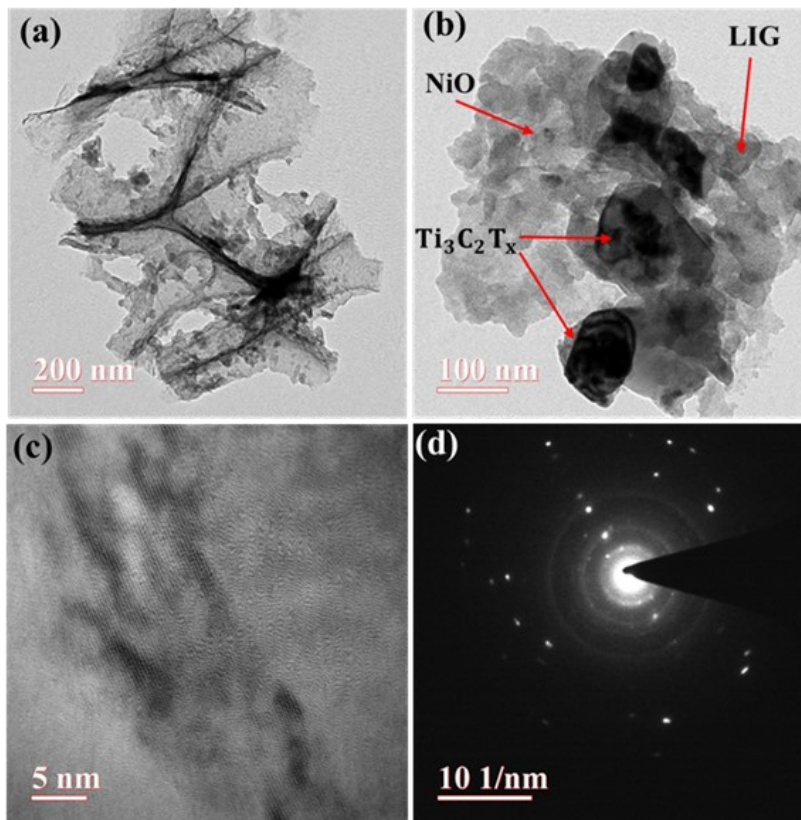

**Figure S4.** (a,b) TEM image of NiO- $\text{Ti}_3\text{C}_2\text{T}_x$ /LIG sample (c) high-resolution TEM image of NiO- $\text{Ti}_3\text{C}_2\text{T}_x$ /LIG (d) SAED pattern of the NiO- $\text{Ti}_3\text{C}_2\text{T}_x$ /LIG sample.

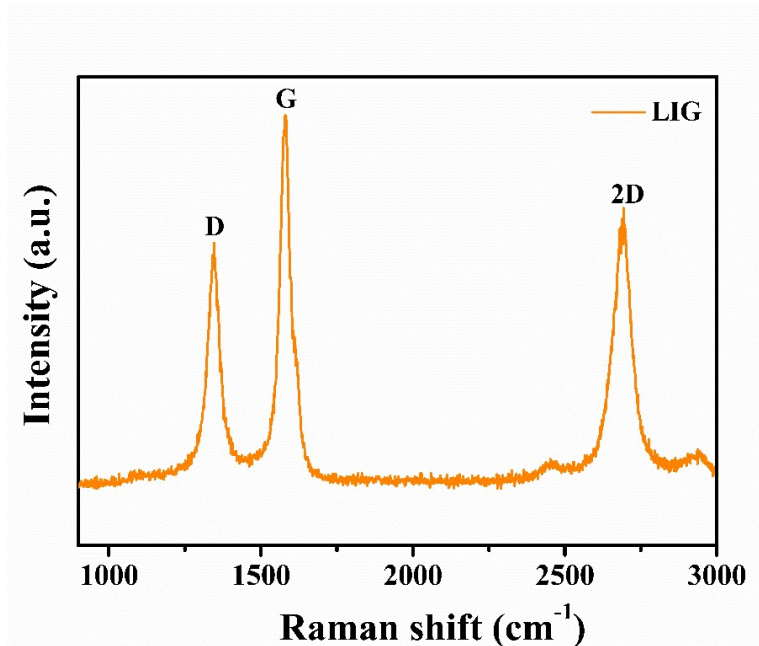

Figure S5. Raman spectra of bare LIG electrode.

**Optimization of experimental parameters:**

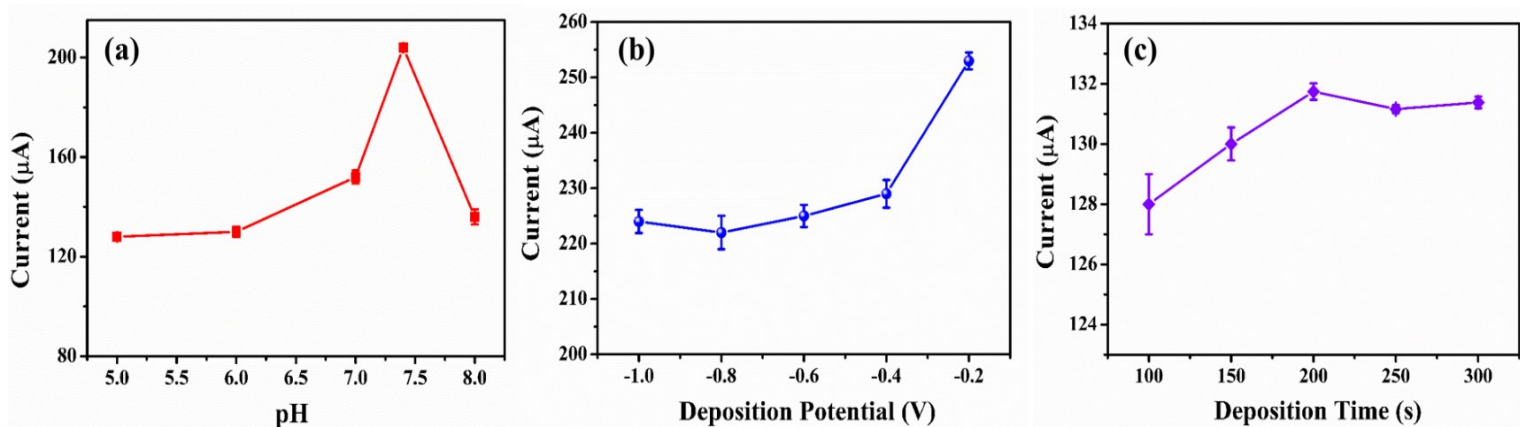

**Figure S6.** Experimental parameters optimization (a) pH of the electrolyte (b) deposition potential (c) deposition time of NiO-Ti<sub>3</sub>C<sub>2</sub>T<sub>x</sub> modified LIG electrode. DPV data were obtained with solution containing 2 mM AA, 1 mM DA and 1 mM UA at 0.1 M potassium phosphate buffer solution. (DPV parameters used: step potential = 4 mV; modulation amplitude = 25 mV; modulation time = 0.20 s, and interval time = 0.5 s, frequency = 25 Hz).

**Table S1.** The calculated values of EIS parameters through fitting of experimental impedance spectra based upon the proposed equivalent circuit in Figure S6.

| Sample                | $R_s$ ( $\Omega$ ) | $R_{ct}$ ( $\Omega$ ) |
|-----------------------|--------------------|-----------------------|
| LIG                   | 93.2               | 5.4                   |
| $Ti_3C_2T_x$ -LIG     | 91                 | 3.8                   |
| $NiO-Ti_3C_2T_x$ /LIG | 71                 | 2.5                   |

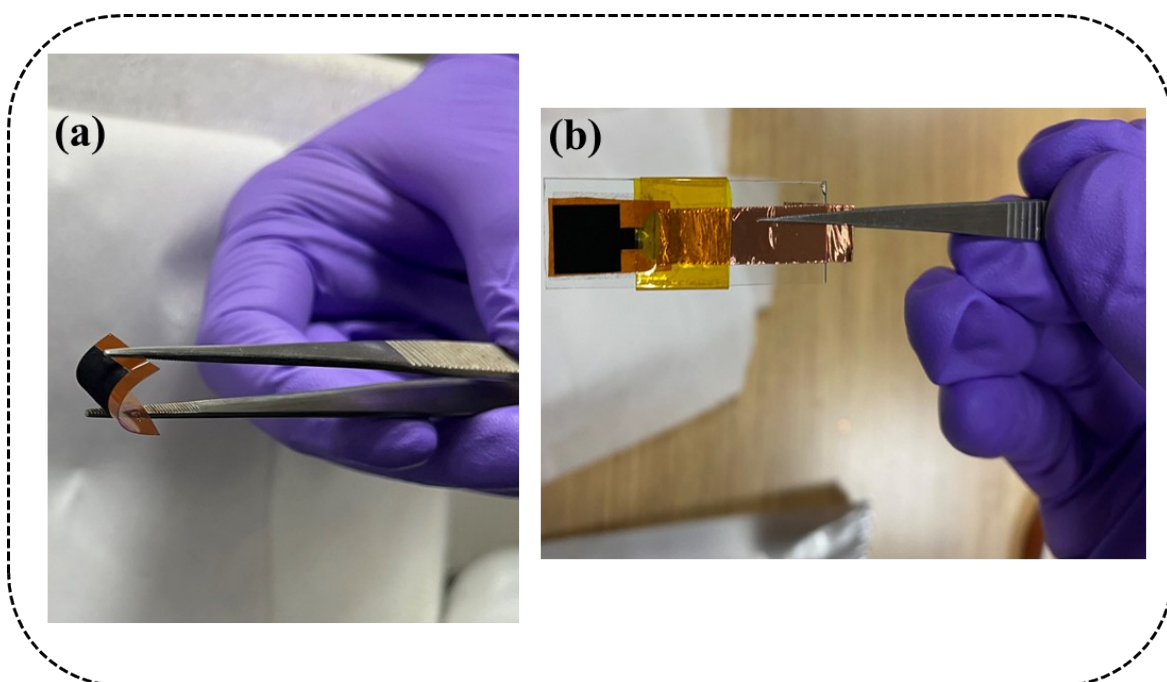

**Figure S7.** (a) The image of  $NiO-Ti_3C_2T_x$ /LIG electrode showing flexibility (b) the fabricated biosensor for detection of AA, DA and UA.
